# Supplementary material
Source: PubMed Central journal article supplement (PMC4298354)
Supplement: jp511485n_si_001.pdf [file jp511485n_si_001.pdf]

**Supporting Information for**  
**Polymorphism in Self-Assembly of Peptide-Based  $\beta$ -**  
**Hairpin Contributes to Network Morphology and**  
**Hydrogel Mechanical Rigidity**

Yifat Miller,<sup>1,2,\*</sup> Buyong Ma<sup>3</sup> and Ruth Nussinov<sup>3,4\*</sup>

<sup>1</sup> *Department of Chemistry and* <sup>2</sup> *Ilse Katz Institute for Nanoscale Science and*  
*Technology, Ben-Gurion University of the Negev, Beér-Sheva 84105, Israel*

<sup>3</sup> *Basic Science Program, Leidos Biomedical Research, Inc. Cancer and Inflammation*  
*Program, National Cancer Institute, Frederick, MD 21702, USA*

<sup>4</sup> *Sackler Inst. of Molecular Medicine Department of Human Genetics and Molecular*  
*Medicine Sackler School of Medicine, Tel Aviv University, Tel Aviv 69978, Israel*

\*Corresponding authors:

Yifat Miller, Department of Chemistry and 2 Ilse Katz Institute for Nanoscale Science and Technology, Ben-Gurion University of the Negev, Beér-Sheva 84105, Israel.

Tel: 972-86428705 Email: [ymiller@bgu.ac.il](mailto:ymiller@bgu.ac.il)

Ruth Nussinov, Basic Science Program, Leidos Biomedical Research, Inc. Cancer and Inflammation Program, National Cancer Institute, Frederick, MD 21702, USA

<sup>4</sup> Sackler Inst. of Molecular Medicine Department of Human Genetics and Molecular Medicine Sackler School of Medicine, Tel Aviv University, Tel Aviv 69978, Israel

Tel: +1 301 846 5579 Email: [ruthnu@helix.nih.gov](mailto:ruthnu@helix.nih.gov)

All eight PDB files of models M1- M8 are available in 8 different files.
